# Supplementary material for: Additive Manufactured Graphene Coating with Synergistic Photothermal and Superhydrophobic Effects for Bactericidal Applications
Source: PubMed Central journal article supplement (PMC6957018; doi:10.1002/gch2.201900054), 2019-10-07
Supplement: GCH2-4-1900054-s001.pdf [file GCH2-4-1900054-s001.pdf]

# Global Challenges

---

Open Access

## Supporting Information

for *Global Challenges*, DOI: 10.1002/gch2.201900054

**Additive Manufactured Graphene Coating with Synergistic  
Photothermal and Superhydrophobic Effects for Bactericidal  
Applications**

*Nan Jiang, Yilin Wang, Kang Cheung Chan, Ching-Yuen  
Chan, Hongzhe Sun,\* and Guijun Li\**

## Supporting Information

### **Additive Manufactured Graphene Coating with Synergistic Photothermal and Superhydrophobic Effects for Bactericidal Applications**

*Nan Jiang<sup>1</sup>, Yilin Wang<sup>2</sup>, Kang Cheung Chan<sup>2</sup>, Ching-Yuen Chan<sup>2</sup>, Hongzhe Sun<sup>\*1</sup> and Guijun Li<sup>\*2,3</sup>*

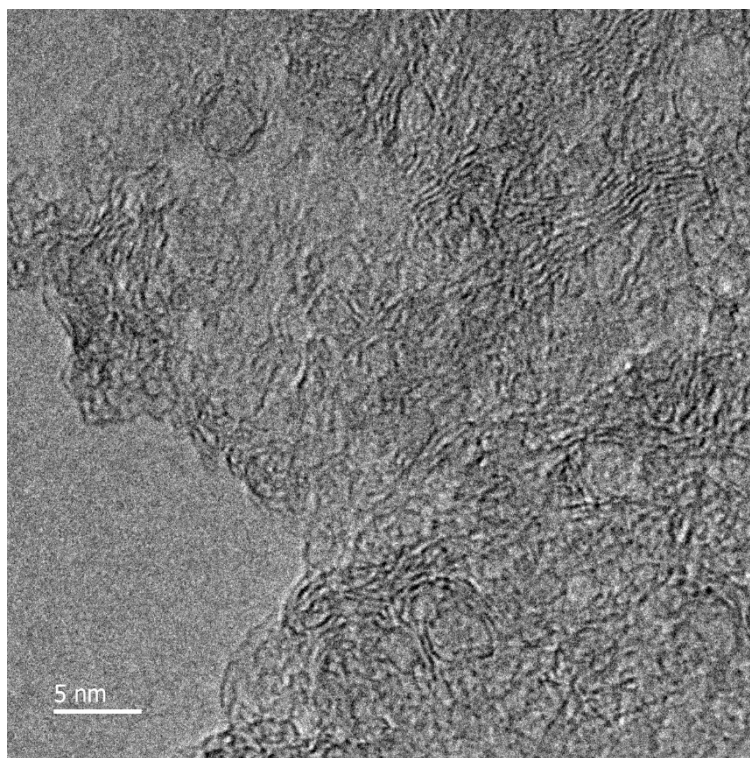

Figure S1. The TEM image of additive manufactured graphene coating.

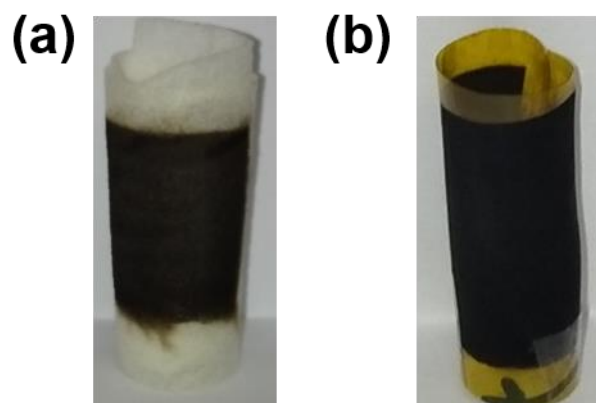

Figure S2. The good resistance of twisting demonstrated by the graphene coated substrates: (a) non-woven fabric and (b) polyimide.
